# Supplementary material
Source: publisher figshare collection journal article supplement (https://sage.figshare.com/ndownloader/files/17985743)
Supplement: Supplementary file 1 [file 17985743]

Table S1. Measurement and descriptive statistics on all individual and country-level variables.

| Variable                                      | Measurement                                                                                                                                                                                                                         | Mean or share per category                | SD    |
|-----------------------------------------------|-------------------------------------------------------------------------------------------------------------------------------------------------------------------------------------------------------------------------------------|-------------------------------------------|-------|
| Dependent variables                           |                                                                                                                                                                                                                                     |                                           |       |
| Wellbeing                                     | Life satisfaction scale, Range: 0 = extremely dissatisfied - 10 = extremely satisfied                                                                                                                                               | 7.22                                      | 2.01  |
| Capabilities                                  | Free to decide how to live life. Agree strongly and Agree = 1, Neither agree nor disagree, Disagree and Disagree strongly = 0                                                                                                       | 0 = 20.00 %<br>1 = 80.00 %                | -     |
| Independent variables at the individual level |                                                                                                                                                                                                                                     |                                           |       |
| Unemployment                                  | Unemployed = 1, In paid work in in education = 0                                                                                                                                                                                    | 0 = 90.38 %<br>1 = 9.62 %                 | -     |
| Age                                           | Measured in years                                                                                                                                                                                                                   | 23.52                                     | 3.48  |
| Sex                                           | Woman = 1, Man = 0                                                                                                                                                                                                                  | 0 = 51.61 %<br>1 = 48.39 %                | -     |
| Unemployment experience                       | Unemployed > 3 months = 1, Never unemployed > 3 months = 0                                                                                                                                                                          | 0 = 68.34 %<br>1 = 31.66 %                | -     |
| Education level                               | Highest level of education completed: ISCED 0-2 = 0, ISCED 3-4 = 1, ISCED 5-6 = 2.<br>In the three-way interactions (Figure 1-5 and Table S5), low education is equal to ISCED 4 or less, and high education is to ISCED 5 or more. | 0 = 23.33 %<br>1 = 45.67 %<br>2 = 30.99 % | -     |
| Migration background                          | Born in country = 0, Not born in country = 1                                                                                                                                                                                        | 0 = 91.16 %<br>1 = 8.84 %                 | -     |
| Limiting longstanding illness                 | Are you hampered in your daily activities in any way by any longstanding illness, or disability, infirmity or mental health problem? Yes, a lot = 1; Yes, to some extent = 2; No = 3                                                | 1 = 1.36 %<br>2 = 7.97 %<br>3 = 90.67 %   | -     |
| Independent variables at the country level    |                                                                                                                                                                                                                                     |                                           |       |
| LMP expenditure                               | Total expenditure on labor market policies as % of GDP, divided by unemployment rate.                                                                                                                                               | 0.21                                      | 0.13  |
| Tracking age                                  | Age of first selection. In years, ranging from age 10 to age 16. Rescaled such that 10 = 0 and 16 = 1                                                                                                                               | 13.98                                     | 2.04  |
| Vocational prevalence                         | Vocational enrollment in upper secondary education, in %. Rescaled such that 0 = 78.96 % and 1 = 13.29 %.                                                                                                                           | 48.82                                     | 15.86 |
| Vocational specificity                        | Students in upper secondary education in a dual system, in %. Rescaled such that 0 = 58.3 % and 1 = 0 %.                                                                                                                            | 17.63                                     | 17.35 |
| Tertiary enrollment rate                      | Share of population aged 20 to 29 years that is enrolled in tertiary education, in %. Rescaled such that 0 = 13.2 % and 1 = 30.7 %.                                                                                                 | 20.51                                     | 4.55  |
| Second chance opportunities                   | No second chance opportunities = 0, intermediate second chance opportunities = 1, Generous second chance opportunities = 2                                                                                                          | 0 = 47.42 %<br>1 = 22.77 %<br>2 = 29.81 % | -     |

Table S2. Sample structure

| Country        | Country abbreviation | Share unemployed aged 18-29 | Students / Employed        |                    | Unemployed                 |                    |
|----------------|----------------------|-----------------------------|----------------------------|--------------------|----------------------------|--------------------|
|                |                      |                             | Without tertiary education | Tertiary education | Without tertiary education | Tertiary education |
| Belgium        | BE                   | .082                        | 368                        | 43                 | 18                         | 5                  |
| Bulgaria       | BG                   | .182                        | 604                        | 385                | 88                         | 37                 |
| Czech Republic | CZ                   | .073                        | 485                        | 127                | 167                        | 23                 |
| Denmark        | DK                   | .060                        | 678                        | 199                | 44                         | 3                  |
| Germany        | DE                   | .061                        | 248                        | 332                | 37                         | 55                 |
| Estonia        | EE                   | .058                        | 665                        | 175                | 76                         | 8                  |
| Ireland        | IE                   | .177                        | 1 088                      | 380                | 115                        | 15                 |
| Greece         | GR                   | .173                        | 605                        | 155                | 51                         | 12                 |
| Spain          | ES                   | .119                        | 769                        | 333                | 75                         | 16                 |
| France         | FR                   | .111                        | 845                        | 375                | 156                        | 44                 |
| Italy          | IT                   | .213                        | 811                        | 294                | 80                         | 19                 |
| Cyprus         | CY                   | .099                        | 496                        | 333                | 102                        | 32                 |
| Lithuania      | LT                   | .066                        | 555                        | 449                | 108                        | 21                 |
| Hungary        | HU                   | .101                        | 362                        | 195                | 93                         | 65                 |
| Netherlands    | NL                   | .045                        | 648                        | 216                | 116                        | 12                 |
| Austria        | AT                   | .045                        | 485                        | 536                | 188                        | 106                |
| Poland         | PL                   | .077                        | 96                         | 23                 | 6                          | 1                  |
| Portugal       | PT                   | .128                        | 94                         | 25                 | 28                         | 13                 |
| Slovenia       | SI                   | .070                        | 281                        | 156                | 29                         | 17                 |
| Slovakia       | SK                   | .097                        | 525                        | 251                | 31                         | 14                 |
| Finland        | FI                   | .061                        | 623                        | 343                | 34                         | 10                 |
| Sweden         | SE                   | .075                        | 932                        | 363                | 117                        | 32                 |
| Great Britain  | GB                   | .088                        | 751                        | 175                | 147                        | 22                 |
| Iceland        | IS                   | .046                        | 834                        | 219                | 98                         | 15                 |
| Norway         | NO                   | .032                        | 694                        | 169                | 66                         | 12                 |
| Switzerland    | CH                   | .043                        | 685                        | 151                | 104                        | 14                 |
| Average        | -                    | .089                        | 368                        | 43                 | 83                         | 24                 |

Source: Own calculations from ESS. Note: "Students / Employed" and "Unemployed" display the absolute number of respondents in each category.

Table S3. Country-level variables

| Country | Tracking age | Vocational prevalence, % | Vocational specificity, % | Tertiary enrollment rate, % | Second chance opportunities | LMP expenditure, % of GDP | Total unemployment rate |
|---------|--------------|--------------------------|---------------------------|-----------------------------|-----------------------------|---------------------------|-------------------------|
| BE      | 12           | 55.33                    | 3.3                       | 19.4                        | Generous                    | 2.09                      | 7.7                     |
| BG      | 13           | 53.48                    | N/A                       | 18.4                        | No                          | 0.29                      | 8.8                     |
| CZ      | 11           | 78.96                    | 35.5                      | 18.2                        | No                          | 0.26                      | 6.4                     |
| DK      | 16           | 54.44                    | 47.7                      | 25.2                        | Generous                    | 1.58                      | 5.5                     |
| DE      | 10           | 59.38                    | 45                        | 18.8                        | No                          | 1.21                      | 7.7                     |
| EE      | 15           | 30.94                    | 30.9                      | 22.5                        | No                          | 0.49                      | 9.9                     |
| IE      | 15           | 32.33                    | 3.8                       | 14.7                        | Intermediate                | 1.86                      | 9.6                     |
| GR      | 15           | 33.94                    | 5.1                       | 29.0                        | No                          | 0.50                      | 12.7                    |
| ES      | 16           | 42.54                    | 2.8                       | 19.0                        | Intermediate                | 2.35                      | 15.2                    |
| FR      | 15           | 42.71                    | 11.3                      | 18.5                        | Intermediate                | 1.74                      | 8.8                     |
| IT      | 14           | 60.55                    | 0                         | 19.4                        | Intermediate                | 1.03                      | 7.7                     |
| CY      | 15           | 13.29                    | N/A                       | 13.2                        | No                          | 0.64                      | 5.8                     |
| LT      | 16           | 29.12                    | N/A                       | 28.6                        | No                          | 0.45                      | 19.5                    |
| HU      | 11           | 26.68                    | 13.2                      | 19.0                        | No                          | 0.50                      | 9.2                     |
| NL      | 12           | 67.98                    | 20                        | 20.6                        | N/A                         | 1.34                      | 4.7                     |
| AT      | 10           | 77.93                    | 32.7                      | 18.5                        | No                          | 1.27                      | 4.9                     |
| PL      | 15           | 45.14                    | 6.5                       | 23.8                        | No                          | 0.40                      | 10.8                    |
| PT      | 15           | 33.2                     | N/A                       | 17.5                        | Generous                    | 1.31                      | 10.6                    |
| SI      | 14           | 60.81                    | 3.7                       | 27.9                        | No                          | 0.57                      | 6.3                     |
| SK      | 11           | 73.21                    | 31.7                      | 16.2                        | No                          | 0.46                      | 12.7                    |
| FI      | 16           | 54.02                    | 10.5                      | 30.7                        | Generous                    | 1.51                      | 7.6                     |
| SE      | 16           | 58.12                    | 0                         | 22.9                        | Generous                    | 0.72                      | 7.4                     |
| GB      | 16           | 31.77                    | 0                         | 14.0                        | Intermediate                | 0.22                      | 6.7                     |
| IS      | 16           | 36.73                    | 16.4                      | 21.9                        | Intermediate                | 0.97                      | 3.2                     |
| NO      | 16           | 59.96                    | 13.3                      | 22.9                        | Generous                    | 0.32                      | 5.0                     |
| CH      | 12           | 64.15                    | 58.3                      | 16.7                        | N/A                         | 1.16                      | 4.3                     |

Source: Individual-level data from ESS. Enrollment and LMP expenditure from Eurostat, tracking age, vocational specificity from OECD, vocational prevalence from UNESCO, second chance opportunities from Eurydice. The indicator of LMP expenditure used in the models is LMP expenditure divided by the unemployment rate.

Table S4 – Correlations between country-level indicators

|                                   | Tracking age | Vocational prevalence(reversed) | Vocational specificity(reversed) | Enrollment rate | Generous SCO | Intermediate SCO | LMP expenditure |
|-----------------------------------|--------------|---------------------------------|----------------------------------|-----------------|--------------|------------------|-----------------|
| Tracking age                      | 1            |                                 |                                  |                 |              |                  |                 |
| Vocational prevalence (reversed)  | 0.50         | 1                               |                                  |                 |              |                  |                 |
| Vocational specificity (reversed) | 0.55         | 0.43                            | 1                                |                 |              |                  |                 |
| Enrollment rate                   | 0.33         | -0.12                           | 0.03                             | 1               |              |                  |                 |
| Generous SCO                      | 0.34         | -0.19                           | 0.09                             | 0.37            | 1            |                  |                 |
| Intermediate SCO                  | 0.35         | 0.35                            | 0.44                             | -0.45           |              | 1                |                 |
| LMP expenditure                   | -0.05        | -0.31                           | -0.24                            | 0.13            | 0.53         | 0.04             | 1               |

Note: Correlations between tracking, vocational prevalence, enrollment and LMP-expenditure based on all 26 countries; correlations with vocational specificity and second chance opportunities based on 22 and 24 countries, respectively. Note also that second chance opportunities is a categorical variable.

Table S5. Three-way interaction effects with wellbeing as outcome

|                                              | Model 1   | Model 2   | Model 3   | Model 4   | Model 5  |
|----------------------------------------------|-----------|-----------|-----------|-----------|----------|
| Unemployed                                   | -1.164*** | -1.074*** | -1.355*** | -1.074*** | -.922*** |
| Tertiary education                           | .544***   | .321**    | .348***   | .348***   | .355***  |
| Unemployed x Tertiary education              | .626*     | .157      | 1.043**   | .394*     | .512*    |
| Tracking                                     | .575*     |           |           |           |          |
| x Unemployed                                 | .448***   |           |           |           |          |
| x Tertiary education                         | -.367***  |           |           |           |          |
| x Unemployed x Tertiary education            | -.656†    |           |           |           |          |
| Vocational prevalence (reversed)             |           | -.425     |           |           |          |
| x Unemployed                                 |           | .392*     |           |           |          |
| x Tertiary education                         |           | -.079     |           |           |          |
| x Unemployed x Tertiary education            |           | .080      |           |           |          |
| Vocational specificity (reversed)            |           |           | -.038     |           |          |
| x Unemployed                                 |           |           | .645***   |           |          |
| x Tertiary education                         |           |           | -.087     |           |          |
| x Unemployed x Tertiary education            |           |           | -1.230*   |           |          |
| Enrollment rate                              |           |           |           | .401      |          |
| x Unemployed                                 |           |           |           | .569***   |          |
| x Tertiary education                         |           |           |           | -.177     |          |
| x Unemployed x Tertiary education            |           |           |           | -.420     |          |
| SCO‡: Generous                               |           |           |           |           | .340     |
| x Unemployed                                 |           |           |           |           | .513***  |
| x Tertiary education                         |           |           |           |           | -.158*   |
| x Unemployed x Tertiary education            |           |           |           |           | -.520*   |
| SCO‡: Intermediate                           |           |           |           |           | .159     |
| x Unemployed                                 |           |           |           |           | .191     |
| x Tertiary education                         |           |           |           |           | -.090    |
| x Unemployed x Tertiary education            |           |           |           |           | -.519*   |
| Constant                                     | 6.619 *** | 7.259***  | 7.095***  | 6.838***  | 6.947*** |
| Intraclass correlation (country- year level) | 0.7 %     | 0.7 %     | 0.6 %     | 0.7 %     | 0.7 %    |
| Intraclass correlation (country level)       | 4.2 %     | 4.8 %     | 4.3 %     | 4.7 %     | 4.5 %    |
| Akaike information criterion                 | 97888     | 97920     | 84738     | 97909     | 91501    |
| N individual level                           | 24 108    | 24 108    | 21 136    | 24 108    | 22 365   |
| N country-year level                         | 90        | 90        | 76        | 90        | 82       |
| N country level                              | 26        | 26        | 22        | 26        | 24       |

Source: Individual-level data from ESS. Enrollment and LMP expenditure from Eurostat, tracking age and vocational specificity from OECD, vocational prevalence from UNESCO, second chance opportunities from Eurydice. Controlled for survey round, age, gender, migration background, unemployment experience, education level and limiting long-standing illness.

\*\*\*<0.001 \*\*<0.01 \*<0.05. SCO‡ = Second chance opportunities. All policy variables are rescaled so as to range from 0 to 1.

Table S6. Multilevel linear models with wellbeing as outcome. Alternative indicators for tracking.

|                                                            | Model 1   | Model 2   |
|------------------------------------------------------------|-----------|-----------|
| Unemployed                                                 | -1.071*** | -1.006*** |
| Number of school tracks<br>(rescaled and reversed)         | .669*     |           |
| x Unemployed                                               | .344*     |           |
| All or most tracks provide higher<br>education eligibility |           | .268      |
| x Unemployed                                               |           | .267**    |
| Constant                                                   | 6.967***  | 7.261***  |
| Intraclass correlation (country-<br>year level)            | 4.2 %     | 4.5 %     |
| Intraclass correlation (country-<br>level)                 | 0.6 %     | 0.7 %     |
| Akaike information criterion                               | 95243     | 94397     |
| N individual-level                                         | 23 264    | 23 264    |
| N country-year level                                       | 86        | 86        |
| N country-level                                            | 25        | 25        |

Source: Number of school tracks from OECD (2007), higher number of school tracks have been reversed, such that higher values imply more inclusiveness. Data on tracks provide higher education eligibility from Orr et al. (2017). Controlled for survey round, LMP expenditure, age, gender, migration background, unemployment experience, education level, and limiting long-standing illness.

\*\*\*<0.001 \*\*<0.01 \*<0.05. All policy variables are rescaled so as to range from 0 to 1.

Table S7. Multilevel linear models with wellbeing as outcome. Employed and students in separate categories, with employed as reference category.

|                                             | Model 1   | Model 2   | Model 3   | Model 4  | Model 5  |
|---------------------------------------------|-----------|-----------|-----------|----------|----------|
| Unemployed                                  | -1.049*** | -1.115*** | -1.199*** | -.923*** | -.731*** |
| Student                                     | .180**    | -.090     | .203**    | .161**   | .257***  |
| Tracking age                                | .435      |           |           |          |          |
| x Unemployed                                | .320**    |           |           |          |          |
| x Student                                   | -.156*    |           |           |          |          |
| Vocational prevalence (reversed)            |           | -.565     |           |          |          |
| x Unemployed                                |           | .624***   |           |          |          |
| x Student                                   |           | .378**    |           |          |          |
| Vocational specificity (reversed)           |           |           | .021      |          |          |
| x Unemployed                                |           |           | .463**    |          |          |
| x Student                                   |           |           | -.220*    |          |          |
| Enrollment rate                             |           |           |           | .404     |          |
| x Unemployed                                |           |           |           | .378*    |          |
| x Student                                   |           |           |           | -.191    |          |
| SCO‡: Generous                              |           |           |           |          | .437     |
| x Unemployed                                |           |           |           |          | .346**   |
| x Student                                   |           |           |           |          | -.345*** |
| SCO‡: Intermediate                          |           |           |           |          | .251     |
| x Unemployed                                |           |           |           |          | .041     |
| x Student                                   |           |           |           |          | -.291*** |
| Constant                                    | 6.858***  | 7.615***  | 7.375***  | 7.130*** | 7.187*** |
| Intraclass correlation (country-year level) | 0.7 %     | 0.7 %     | 0.6 %     | 0.7 %    | 0.7 %    |
| Intraclass correlation (country-level)      | 4.5 %     | 4.8 %     | 4.4 %     | 4.8 %    | 4.5 %    |
| Akaike information criterion                | 97402     | 97871     | 84713     | 97876    | 91446    |
| N individual-level                          | 24 108    | 24 108    | 21 136    | 24 108   | 22 365   |
| N country-year level                        | 90        | 90        | 76        | 90       | 82       |
| N country-level                             | 26        | 26        | 22        | 26       | 24       |

Source: Individual-level data from ESS. Enrollment and LMP expenditure from Eurostat, tracking age and vocational specificity from OECD, Vocational prevalence (reversed) from UNESCO, second chance opportunities from Eurydice. Controlled for survey round, age, gender, migration background, unemployment experience, education level and limiting long-standing illness.

\*\*\*<0.001 \*\*<0.01 \*<0.05. SCO‡ = Second chance opportunities. All policy variables are rescaled so as to range from 0 to 1.

Table S8. Multilevel linear models with wellbeing as outcome. With self-rated health and subjective income as control variables.

|                                             | Model 1  | Model 2  | Model 3  | Model 4  | Model 5  |
|---------------------------------------------|----------|----------|----------|----------|----------|
| Unemployed                                  | -.803*** | -.813*** | -.949*** | -.667*** | -.528*** |
| Tracking age                                | .303     |          |          |          |          |
| x Unemployed                                | .362**   |          |          |          |          |
| Vocational prevalence (reversed)            |          | -.417    |          |          |          |
| x Unemployed                                |          | .436**   |          |          |          |
| Vocational specificity (reversed)           |          |          | -.068    |          |          |
| x Unemployed                                |          |          | .450**   |          |          |
| Enrollment rate                             |          |          |          | .365     |          |
| x Unemployed                                |          |          |          | .279*    |          |
| SCO‡: Generous                              |          |          |          |          | .295     |
| x Unemployed                                |          |          |          |          | .433***  |
| SCO‡: Intermediate                          |          |          |          |          | .028     |
| x Unemployed                                |          |          |          |          | .131     |
| Constant                                    | 6.019*** | 6.479*** | 6.283*** | 6.080*** | 6.218*** |
| Intraclass correlation (country-year level) | 0.7 %    | 0.6 %    | 0.4 %    | 0.6 %    | 0.5 %    |
| Intraclass correlation (country-level)      | 3.2 %    | 3.4 %    | 3.5 %    | 3.4 %    | 3.3 %    |
| Akaike information criterion                | 94372    | 94376    | 81497    | 94378    | 88240    |
| N individual-level                          | 23 707   | 23 707   | 20 761   | 23 707   | 21 995   |
| N country-year level                        | 90       | 90       | 76       | 90       | 82       |
| N country-level                             | 26       | 26       | 22       | 26       | 24       |

Source: Individual-level data from ESS. Enrollment and LMP expenditure from Eurostat, tracking age and vocational specificity from OECD, vocational prevalence from UNESCO, second chance opportunities from Eurydice. Controlled for survey round, LMP expenditure, age, gender, migration background, unemployment experience, education level, subjective income and self-rated health.

\*\*\*<0.001 \*\*<0.01 \*<0.05 † < .10. SCO‡ = Second chance opportunities. All policy variables are rescaled so as to range from 0 to 1.



Table S9. Multilevel linear models with wellbeing as outcome. With country youth unemployment rate as control variable.

|                                             | Model 1   | Model 2   | Model 3   | Model 4   | Model 5   |
|---------------------------------------------|-----------|-----------|-----------|-----------|-----------|
| Unemployed                                  | -1.233*** | -1.174*** | -1.302*** | -1.158*** | -1.106*** |
| Tracking age                                | .560*     |           |           |           |           |
| x Unemployed                                | .422**    |           |           |           |           |
| Vocational prevalence (reversed)            |           | -.565     |           |           |           |
| x Unemployed                                |           | .400*     |           |           |           |
| Vocational specificity (reversed)           |           |           | .272      |           |           |
| x Unemployed                                |           |           | .567**    |           |           |
| Enrollment rate                             |           |           |           | .504      |           |
| x Unemployed                                |           |           |           | .402**    |           |
| SCO $\ddagger$ : Generous                   |           |           |           |           | .707**    |
| x Unemployed                                |           |           |           |           | .282**    |
| SCO $\ddagger$ : Intermediate               |           |           |           |           | .481*     |
| x Unemployed                                |           |           |           |           | -.019     |
| Youth unemployment rate                     | -1.352*** | -1.009**  | -1.227**  | -1.234**  | -1.034**  |
| x Unemployed                                | .229      | .284      | -.008     | .335*     | .423*     |
| Constant                                    | 8.181***  | 8.658***  | 8.313***  | 8.285***  | 8.124***  |
| Intraclass correlation (country-year level) | 0.6 %     | 0.6 %     | 0.5 %     | 0.7 %     | 0.7 %     |
| Intraclass correlation (country-level)      | 6.0 %     | 6.6 %     | 5.2 %     | 6.5 %     | 4.7 %     |
| Akaike information criterion                | 97879     | 97888     | 84721     | 97885     | 91482     |
| N individual-level                          | 24 108    | 24 108    | 21 136    | 24 108    | 22 365    |
| N country-year level                        | 90        | 90        | 76        | 90        | 82        |
| N country-level                             | 26        | 26        | 22        | 26        | 24        |

Source: Individual-level data from ESS. Enrollment and youth unemployment rate from Eurostat, tracking age and vocational specificity from OECD, vocational prevalence from UNESCO, second chance opportunities from Eurydice. Controlled for survey round, age, gender, migration background, unemployment experience, education level and limiting long-standing illness.

\*\*\*<0.001 \*\*<0.01 \*<0.05 † < .10. SCO $\ddagger$  = Second chance opportunities. All policy variables are rescaled so as to range from 0 to 1.

Table S10. Multilevel linear models with wellbeing as outcome. With GDP per capita rate as control variable.

|                                             | Model 1   | Model 2   | Model 3   | Model 4   | Model 5  |
|---------------------------------------------|-----------|-----------|-----------|-----------|----------|
| Unemployed                                  | -1.098*** | -1.082*** | -1.245*** | -1.016*** | -.820*** |
| Tracking age                                | .186      |           |           |           |          |
| x Unemployed                                | .494***   |           |           |           |          |
| Vocational prevalence (reversed)            |           | -.513     |           |           |          |
| x Unemployed                                |           | .488**    |           |           |          |
| Vocational specificity (reversed)           |           |           | -.401     |           |          |
| x Unemployed                                |           |           | .557***   |           |          |
| Enrollment rate                             |           |           |           | .539      |          |
| x Unemployed                                |           |           |           | .444**    |          |
| SCO‡: Generous                              |           |           |           |           | .282     |
| x Unemployed                                |           |           |           |           | .345**   |
| SCO‡: Intermediate                          |           |           |           |           | .037     |
| x Unemployed                                |           |           |           |           | .095     |
| GDP per capita                              | 1.875***  | 1.740***  | 1.452***  | 1.950***  | 1.563*** |
| x Unemployed                                | -.164     | 0.31      | -.124     | .041      | -.270    |
| Constant                                    | 7.022***  | 7.435***  | 7.411***  | 7.034***  | 7.215*** |
| Intraclass correlation (country-year level) | 0.7 %     | 0.7 %     | 0.5 %     | 0.7 %     | 0.7 %    |
| Intraclass correlation (country-level)      | 4.6 %     | 4.4 %     | 4.9 %     | 4.1 %     | 4.7 %    |
| Akaike information criterion                | 97874     | 97881     | 84720     | 97879     | 91488    |
| N individual-level                          | 24 108    | 24 108    | 21 136    | 24 108    | 22 365   |
| N country-year level                        | 90        | 90        | 76        | 90        | 82       |
| N country-level                             | 26        | 26        | 22        | 26        | 24       |

Source: Individual-level data from ESS. Enrollment and GDP per capita from Eurostat, tracking age and vocational specificity from OECD, vocational prevalence from UNESCO, second chance opportunities from Eurydice. Controlled for survey round, age, gender, migration background, unemployment experience, education level and limiting long-standing illness.

\*\*\*<0.001 \*\*<0.01 \*<0.05 † < .10. SCO‡ = Second chance opportunities. All policy variables are rescaled so as to range from 0 to 1.

Table S11. Multilevel linear models with wellbeing as outcome. With expenditure on passive and active labor market policies as control variables.

|                                             | Model 1   | Model 2  | Model 3   | Model 4   | Model 5   |
|---------------------------------------------|-----------|----------|-----------|-----------|-----------|
| Unemployed                                  | -1.111*** | -.987*** | -1.229*** | -1.026*** | -.755***  |
| Tracking age                                | .407      |          |           |           |           |
| x Unemployed                                | .503***   |          |           |           |           |
| Vocational prevalence (reversed)            |           | -.360    |           |           |           |
| x Unemployed                                |           | .364*    |           |           |           |
| Vocational specificity (reversed)           |           |          | .230      |           |           |
| x Unemployed                                |           |          | .513*     |           |           |
| Enrollment rate                             |           |          |           | .299      |           |
| x Unemployed                                |           |          |           | .670***   |           |
| SCO $\ddagger$ : Generous                   |           |          |           |           | .259      |
| x Unemployed                                |           |          |           |           | .545***   |
| SCO $\ddagger$ : Intermediate               |           |          |           |           | .219      |
| x Unemployed                                |           |          |           |           | -.011     |
| PLMP-expenditure                            | .508      | .487     | .280      | .519      | .354      |
| x Unemployed                                | .431*     | .322     | .090      | .645      | .363      |
| ALMP-expenditure                            | 1.176**   | 1.062    | 1.264**   | 1.112*    | 1.167     |
| x Unemployed                                | -.911**   | -.566    | -.293     | -1.261**  | -1.481*** |
| Constant                                    | 7.176***  | 7.64 *** | 7.255***  | 7.327***  | 7.410***  |
| Intraclass correlation (country-year level) | 0.7 %     | 0.7 %    | 0.5 %     | 0.7 %     | 0.7 %     |
| Intraclass correlation (country-level)      | 4.3 %     | 4.7 %    | 3.8 %     | 4.7 %     | 4.7 %     |
| Akaike information criterion                | 94385     | 94401    | 81251     | 94387     | 91471     |
| N individual-level                          | 24 108    | 24 108   | 21 136    | 24 108    | 22 365    |
| N country-year level                        | 90        | 90       | 76        | 90        | 82        |
| N country-level                             | 26        | 26       | 22        | 26        | 24        |

Source: Individual-level data from ESS. Enrollment and LMP-expenditure from Eurostat, tracking age and vocational specificity from OECD, vocational prevalence from UNESCO, second chance opportunities from Eurydice. Controlled for survey round, age, gender, migration background, unemployment experience, education level and limiting long-standing illness.

\*\*\*<0.001 \*\*<0.01 \*<0.05 † < .10. SCO $\ddagger$  = Second chance opportunities. All policy variables are rescaled so as to range from 0 to 1.

Table S12. Multilevel linear models with wellbeing as outcome. Limited to countries with full country data.

|                                             | Model 1   | Model 2  | Model 3   | Model 4   | Model 5  |
|---------------------------------------------|-----------|----------|-----------|-----------|----------|
| Unemployed                                  | -1.060*** | -.886*** | -1.272*** | -1.109*** | -.824*** |
| Tracking age                                | .518*     |          |           |           |          |
| x Unemployed                                | .363*     |          |           |           |          |
| Vocational prevalence (reversed)            |           | -.476    |           |           |          |
| x Unemployed                                |           | .123     |           |           |          |
| Vocational specificity (reversed)           |           |          | .196      |           |          |
| x Unemployed                                |           |          | .551**    |           |          |
| Enrollment rate                             |           |          |           | .517      |          |
| x Unemployed                                |           |          |           | .673***   |          |
| SCO‡: Generous                              |           |          |           |           | .565*    |
| x Unemployed                                |           |          |           |           | .221     |
| SCO‡: Intermediate                          |           |          |           |           | .121     |
| x Unemployed                                |           |          |           |           | .070     |
| Constant                                    | 7.134***  | 7.697*** | 7.946***  | 7.230***  | 7.430*** |
| Intraclass correlation (country-year level) | 0.7 %     | 0.7 %    | 0.7 %     | 0.7 %     | 0.6 %    |
| Intraclass correlation (country-level)      | 3.1 %     | 3.1 %    | 4.1 %     | 3.6 %     | 3.1 %    |
| Akaike information criterion                | 78353     | 78366    | 78357     | 78346     | 78364    |
| N individual-level                          | 19 393    | 19 393   | 19 393    | 19 393    | 19 393   |
| N country-year level                        | 67        | 67       | 67        | 67        | 67       |
| N country-level                             | 20        | 20       | 20        | 20        | 20       |

Source: Individual-level data from ESS. Enrollment and LMP expenditure from Eurostat, tracking age and vocational specificity from OECD, vocational prevalence from UNESCO, second chance opportunities from Eurydice. Controlled for survey round, LMP expenditure, age, gender, migration background, unemployment experience, education level and limiting long-standing illness.

\*\*\*<0.001 \*\*<0.01 \*<0.05. SCO‡ = Second chance opportunities.

Note: the Netherlands, Switzerland Bulgaria, Cyprus, Lithuania and Portugal excluded. All policy variables are rescaled so as to range from 0 to 1.

Table S13. Multilevel linear models with wellbeing as outcome. Random slope for unemployment.

|                                                          | Model 1   | Model 2   | Model 3   | Model 4  | Model 5  |
|----------------------------------------------------------|-----------|-----------|-----------|----------|----------|
| Unemployed                                               | -1.075*** | -1.000*** | -1.279*** | -.955*** | -.817*** |
| Tracking age                                             | .406      |           |           |          |          |
| x Unemployed                                             | .452*     |           |           |          |          |
| Vocational prevalence (reversed)                         |           | -.428     |           |          |          |
| x Unemployed                                             |           | .484*     |           |          |          |
| Vocational specificity (reversed)                        |           |           | -.075     |          |          |
| x Unemployed                                             |           |           | .564*     |          |          |
| Enrollment rate                                          |           |           |           | .340     |          |
| x Unemployed                                             |           |           |           | .361     |          |
| SCO‡: Generous                                           |           |           |           |          | .312     |
| x Unemployed                                             |           |           |           |          | .344     |
| SCO‡: Intermediate                                       |           |           |           |          | .131     |
| x Unemployed                                             |           |           |           |          | .115     |
| Constant                                                 | 7.176***  | 7.693***  | 7.51***   | 7.314*** | 7.428*** |
| Intraclass correlation (country-year level)              | 0.6 %     | 0.6 %     | 0.6 %     | 0.7 %    | 0.7 %    |
| Intraclass correlation (country-level)                   | 4.6 %     | 4.7 %     | 4.4 %     | 4.7 %    | 4.5 %    |
| Variance component for unemployment (country-year level) | .026      | .016      | .021      | .006     | .014     |
| Variance component for unemployment (country-level)      | .087      | .097      | .053      | .099     | .098     |
| Akaike information criterion                             | 97825     | 97828     | 84687     | 97828    | 78364    |
| N individual-level                                       | 24 108    | 24 108    | 21 136    | 24 108   | 22 365   |
| N country-year level                                     | 90        | 90        | 76        | 90       | 82       |
| N country-level                                          | 26        | 26        | 22        | 26       | 24       |

Source: Individual-level data from ESS. Enrollment and LMP expenditure from Eurostat, tracking age and vocational specificity from OECD, vocational prevalence from UNESCO, second chance opportunities from Eurydice. Controlled for survey round, LMP expenditure, age, gender, migration background, unemployment experience, education level and limiting long-standing illness.

\*\*\*<0.001 \*\*<0.01 \*<0.05. SCO‡ = Second chance opportunities. All policy variables are rescaled so as to range from 0 to 1.
